# Supplementary material for: NAT10-Mediated N4-Acetylcytidine of RNA Contributes to Post-transcriptional Regulation of Mouse Oocyte Maturation in vitro
Source: Front Cell Dev Biol. 2021 Jul 30;9:704341. doi: 10.3389/fcell.2021.704341 (PMC8363255; doi:10.3389/fcell.2021.704341)
Supplement: Supplementary file 3 [file Data_Sheet_2.xlsx]

## Sheet: upregulation
category	Term		Count	%	PValue	Genes	List Total	Pop Hits	Pop Total	Fold Enrichment	Bonferroni	Benjamini	FDR
GOTERM_BP_DIRECT	GO:0007155	cell adhesion	5	21.7391	0.00154096	PTPRS, ITGA3, L1CAM, PTPRF, LOXL2	20	459	16792	9.14597	0.291	0.343634	0.343634
GOTERM_BP_DIRECT	GO:0098609	cell-cell adhesion	4	17.3913	0.00332639	AHNAK, SPTBN2, PLEC, HCFC1	20	271	16792	12.3926	0.524326	0.370893	0.370893
GOTERM_BP_DIRECT	GO:0046849	bone remodeling	2	8.69565	0.0123799	NOTCH2, LRP5	20	11	16792	152.655	0.937834	0.920239	0.920239
GOTERM_BP_DIRECT	GO:0007268	chemical synaptic transmission	3	13.0435	0.0296468	PTPRS, SLC12A7, PTPRF	20	240	16792	10.495	0.998783	1	1
GOTERM_BP_DIRECT	GO:0007613	memory	2	8.69565	0.0679045	ITGA3, ITPR3	20	62	16792	27.0839	1	1	1
GOTERM_CC_DIRECT	GO:0043235	receptor complex	4	17.3913	0.000461994	NOTCH2, ITGA3, LRP5, ITPR3	23	127	18224	24.9558	0.035402	0.0214693	0.0203683
GOTERM_CC_DIRECT	GO:0005913	cell-cell adherens junction	5	21.7391	0.000550495	AHNAK, DLG5, SPTBN2, PLEC, HCFC1	23	323	18224	12.2654	0.0420411	0.0214693	0.0203683
GOTERM_CC_DIRECT	GO:0005886	plasma membrane	13	56.5217	0.00112691	AHNAK, DLG5, SPTBN2, PLEC, HCFC2	23	4121	18224	2.49952	0.0841921	0.0292997	0.0277972
GOTERM_CC_DIRECT	GO:0043025	neuronal cell body	4	17.3913	0.00617447	AHNAK, DLG5, SPTBN2, PLEC, HCFC3	23	315	18224	10.0616	0.383133	0.120402	0.114228
GOTERM_CC_DIRECT	GO:0005925	focal adhesion	4	17.3913	0.0111503	AHNAK, DLG5, SPTBN2, PLEC, HCFC4	23	391	18224	8.10586	0.582973	0.158556	0.150425
GOTERM_CC_DIRECT	GO:0016020	membrane	8	34.7826	0.0121966	AHNAK, DLG5, SPTBN2, PLEC, HCFC5	23	2200	18224	2.88126	0.616028	0.158556	0.150425
GOTERM_CC_DIRECT	GO:0043034	costamere	2	8.69565	0.0227004	AHNAK, DLG5, SPTBN2, PLEC, HCFC6	23	19	18224	83.405	0.833213	0.236291	0.224174
GOTERM_CC_DIRECT	GO:0005887	integral component of plasma membrane	6	26.087	0.024235	AHNAK, DLG5, SPTBN2, PLEC, HCFC7	23	1415	18224	3.35978	0.852453	0.236291	0.224174
GOTERM_CC_DIRECT	GO:0031012	extracellular matrix	3	13.0435	0.0490601	AHNAK, DLG5, SPTBN2, PLEC, HCFC8	23	296	18224	8.03055	0.980233	0.425187	0.403383
GOTERM_CC_DIRECT	GO:0005903	brush border	2	8.69565	0.0700211	AHNAK, DLG5, SPTBN2, PLEC, HCFC9	23	60	18224	26.4116	0.996525	0.546164	0.518156
GOTERM_CC_DIRECT	GO:0042383	sarcolemma	2	8.69565	0.0977931	AHNAK, DLG5, SPTBN2, PLEC, HCFC10	23	85	18224	18.6435	0.999674	0.693442	0.657881
GOTERM_MF_DIRECT	GO:0098641	cadherin binding involved in cell-cell adhesion	4	17.3913	0.00396517	AHNAK, DLG5, SPTBN2, PLEC, HCFC11	20	290	16881	11.6421	0.278044	0.325144	0.325144
GOTERM_MF_DIRECT	GO:0005001	transmembrane receptor protein tyrosine phosphatase activity	2	8.69565	0.0189715	AHNAK, DLG5, SPTBN2, PLEC, HCFC12	20	17	16881	99.3	0.792082	0.777833	0.777833
KEGG_PATHWAY	hsa04918	Thyroid hormone synthesis	2	8.69565	0.0972843	AHNAK, DLG5, SPTBN2, PLEC, HCFC13	11	70	6879	17.8675	0.999749	0.751555	0.751555

## Sheet: downregulation and not signific
Category	Term		Count	%	PValue	Genes	List Total	Pop Hits	Pop Total	Fold Enrichment	Bonferroni	Benjamini	FDR
GOTERM_BP_DIRECT	GO:0098609	cell-cell adhesion	13	13	4.07341e-08	UNC45A, EEF2, PPL, SND1, VASN, FAM129B, EHD1, LARP1, BAG3, FASN, FLNB, SFN, HSPA1A	96	271	16792	8.39084	2.52955e-05	2.52958e-05	2.52958e-05
GOTERM_BP_DIRECT	GO:0007016	cytoskeletal anchoring at plasma membrane	3	3	0.001685	JUP, FLNB, TLN1	96	11	16792	47.7045	0.649104	0.523192	0.523192
GOTERM_BP_DIRECT	GO:0016569	covalent chromatin modification	5	5	0.0038681	BAG6, CBX6, TRIM28, BAHD1, ARID1A	96	113	16792	7.73968	0.909892	0.722085	0.722085
GOTERM_BP_DIRECT	GO:0030154	cell differentiation	9	9	0.00465111	UNC45A, BAG6, NOTCH2NL, HUWE1, FLNB, AMBRA1, PRRC2B, TYMP, PRRC2A	96	462	16792	3.40747	0.944705	0.722085	0.722085
GOTERM_BP_DIRECT	GO:2001137	positive regulation of endocytic recycling	2	2	0.0224405	EHD1, EHD2	96	4	16792	87.4583	0.999999	1	1
GOTERM_BP_DIRECT	GO:0031325	positive regulation of cellular metabolic process	2	2	0.0279723	ACLY, FASN	96	5	16792	69.9667	1	1	1
GOTERM_BP_DIRECT	GO:0050821	protein stabilization	4	4	0.0419614	BAG6, BAG3, FLNA, HSPA1A	96	136	16792	5.14461	1	1	1
GOTERM_BP_DIRECT	GO:0030512	negative regulation of transforming growth factor beta receptor signaling pathway	3	3	0.0509155	VASN, HSPA1A, BCL9L	96	64	16792	8.19922	1	1	1
GOTERM_BP_DIRECT	GO:0003334	keratinocyte development	2	2	0.0551702	SFN, FLNB	96	10	16792	34.9833	1	1	1
GOTERM_BP_DIRECT	GO:0006260	DNA replication	4	4	0.057762	UPF1, NFIC, IGHMBP2, MCM2	96	155	16792	4.51398	1	1	1
GOTERM_BP_DIRECT	GO:0034976	response to endoplasmic reticulum stress	3	3	0.0673693	CEBPB, ABL1, EEF2	96	75	16792	6.99667	1	1	1
GOTERM_BP_DIRECT	GO:1900034	regulation of cellular response to heat	3	3	0.0673693	RPTOR, BAG3, HSPA1A	96	75	16792	6.99667	1	1	1
GOTERM_BP_DIRECT	GO:0000956	nuclear-transcribed mRNA catabolic process	2	2	0.071126	UPF1, DHX34	96	13	16792	26.9103	1	1	1
GOTERM_BP_DIRECT	GO:0010839	negative regulation of keratinocyte proliferation	2	2	0.0763852	EPPK1, SFN	96	14	16792	24.9881	1	1	1
GOTERM_BP_DIRECT	GO:0031929	TOR signaling	2	2	0.0763852	RPTOR, LARP1	96	14	16792	24.9881	1	1	1
GOTERM_BP_DIRECT	GO:0042993	positive regulation of transcription factor import into nucleus	2	2	0.0816148	TRIM28, FLNA	96	15	16792	23.3222	1	1	1
GOTERM_BP_DIRECT	GO:0030335	positive regulation of cell migration	4	4	0.086449	FAM83H, ROR2, BCAR1, IGF1R	96	184	16792	3.80254	1	1	1
GOTERM_BP_DIRECT	GO:1901741	positive regulation of myoblast fusion	2	2	0.0919864	EHD1, EHD2	96	17	16792	20.5784	1	1	1
GOTERM_BP_DIRECT	GO:0071901	negative regulation of protein serine/threonine kinase activity	2	2	0.0971287	ABL1, SFN	96	18	16792	19.4352	1	1	1
GOTERM_CC_DIRECT	GO:0005913	cell-cell adherens junction	16	16	1.38751e-10	UNC45A, JUP, EEF2, PPL, SND1, VASN, FAM129B, EHD1, LARP1, BAG3, FASN, FLNA, FLNB, SFN, TLN1, HSPA1A	97	323	18224	9.30657	2.56689e-08	2.56688e-08	2.44201e-08
GOTERM_CC_DIRECT	GO:0005654	nucleoplasm	30	30	0.000157727	GTF3C1, CEBPB, PWWP2B, MLLT1, IRF2BPL, FAM129B, BAG6, RPTOR, RAI1, RBM15B, LARP1, PDCD11, TRIM28, POLR2A, BAHD1, ABL1, PTRF, BCL9L, UPF1, CBX6, INTS1, H2AFX, HUWE1, ARID1A, NCOR2, BOP1, ACLY, POLR1A, MCM2, HSPA1A	97	2784	18224	2.02453	0.0287601	0.0145897	0.01388
GOTERM_CC_DIRECT	GO:0005737	cytoplasm	45	45	0.00025134	STEAP3, CEBPB, DCTN1, NOTCH2NL, IGHMBP2, MLLT1, AMBRA1, FAM129B, BAG6, RPTOR, FAM83H, LARP1, BAG3, ABL1, FLNA, FLNB, SFN, CAPN1, PTRF, PHLDA3, UPF1, LRRC26, CLUH, URGCP, JUP, NCKAP5L, HUWE1, KLHL21, FBXL16, EEF2, SND1, CHERP, PRRC2A, BOP1, ACLY, PC, POLR1A, FASN, MAP7D1, UBA1, EPPK1, TLN1, BCAR1, MCM2, HSPA1A	97	5222	18224	1.619	0.0454391	0.0154993	0.0147453
GOTERM_CC_DIRECT	GO:0016020	membrane	25	25	0.000354617	GTF3C1, DCTN1, IGHMBP2, PHRF1, IGF1R, BAG6, GYS1, LARP1, DHX34, FLNA, CAPN1, SLC16A3, INTS1, HUWE1, HPS6, EEF2, SND1, CHERP, PRRC2A, NCOR2, EHD1, ACLY, FASN, PNPLA6, LRP10	97	2200	18224	2.13496	0.0635093	0.016401	0.0156031
GOTERM_CC_DIRECT	GO:0005739	mitochondrion	18	18	0.00053996	CLPB, AMBRA1, POLRMT, PPL, SND1, VASN, HK1, RAI1, PC, PDF, DHX34, FASN, ABL1, UBA1, SFN, CAPN1, PTRF, HSPA1A	97	1331	18224	2.54078	0.0950898	0.0188956	0.0179764
GOTERM_CC_DIRECT	GO:0005829	cytosol	32	32	0.00061283	CHPF, DCTN1, AMBRA1, FAM129B, HK1, TYMP, RHOBTB2, BAG6, RPTOR, GYS1, PDCD11, BAG3, ABL1, FLNA, FLNB, SFN, CAPN1, PTRF, UPF1, JUP, HUWE1, AP1B1, EEF2, FBXO31, ACLY, EHD2, PC, FASN, UBA1, TLN1, BCAR1, HSPA1A	97	3315	18224	1.81359	0.107214	0.0188956	0.0179764
GOTERM_CC_DIRECT	GO:0015629	actin cytoskeleton	7	7	0.00103622	JUP, ABL1, FLNA, FLNB, SLC16A3, BCAR1, FAM129B	97	218	18224	6.03272	0.174528	0.0273857	0.0260534
GOTERM_CC_DIRECT	GO:0005730	nucleolus	13	13	0.00178921	GTF3C1, MLLT1, FAM129B, BOP1, RBM15B, PDCD11, POLR2A, POLR1A, NFIC, ABL1, FLNA, BCAR1, BCL9L	97	857	18224	2.84993	0.28201	0.0413754	0.0393626
GOTERM_CC_DIRECT	GO:0005634	nucleus	42	42	0.00453746	GTF3C1, CEBPB, CCNF, IGHMBP2, MLLT1, PPL, IRF2BPL, FAM129B, BAG6, RAI1, ZNF629, PDCD11, TRIM28, POLR2A, DHX34, ABL1, FLNA, ZNF503, SFN, SBF1, PTRF, BCL9L, UNC45A, UPF1, CBX6, KLF13, URGCP, JUP, ZNF282, H2AFX, HUWE1, EEF2, ARID1A, SND1, PRRC2A, NCOR2, BOP1, EHD2, POLR1A, NFIC, UBA1, MCM2	97	5415	18224	1.45721	0.568868	0.09327	0.0887325
GOTERM_CC_DIRECT	GO:0030057	desmosome	3	3	0.00702848	JUP, UBA1, PPL	97	24	18224	23.4845	0.728789	0.130027	0.123701
GOTERM_CC_DIRECT	GO:0000785	chromatin	4	4	0.0116037	NCOR2, UPF1, BAHD1, MCM2	97	89	18224	8.44388	0.884588	0.184365	0.175396
GOTERM_CC_DIRECT	GO:0001726	ruffle	4	4	0.0119588	ABL1, MTSS1L, TLN1, BCAR1	97	90	18224	8.35006	0.89201	0.184365	0.175396
GOTERM_CC_DIRECT	GO:0005765	lysosomal membrane	6	6	0.0149376	RPTOR, VPS18, AP1B1, UBA1, HPS6, VASN	97	274	18224	4.11408	0.938227	0.212573	0.202231
GOTERM_CC_DIRECT	GO:0005925	focal adhesion	7	7	0.0172835	JUP, FLNA, FLNB, CAPN1, TLN1, BCAR1, HSPA1A	97	391	18224	3.36351	0.96026	0.22839	0.217279
GOTERM_CC_DIRECT	GO:0030018	Z disc	4	4	0.0244636	JUP, BAG3, FLNA, FLNB	97	118	18224	6.36869	0.989766	0.301718	0.28704
GOTERM_CC_DIRECT	GO:0030529	intracellular ribonucleoprotein complex	4	4	0.0351431	GTF3C1, BOP1, IGHMBP2, EEF2	97	136	18224	5.52577	0.998665	0.395059	0.37584
GOTERM_CC_DIRECT	GO:0031931	TORC1 complex	2	2	0.0363027	RPTOR, LARP1	97	7	18224	53.6789	0.998931	0.395059	0.37584
GOTERM_CC_DIRECT	GO:0030056	hemidesmosome	2	2	0.0413812	JUP, EPPK1	97	8	18224	46.9691	0.999598	0.425307	0.404616
GOTERM_CC_DIRECT	GO:0048471	perinuclear region of cytoplasm	8	8	0.0455948	UNC45A, EHD1, EHD2, ABL1, FLNA, AMBRA1, HSPA1A, CHERP	97	621	18224	2.42031	0.999822	0.443949	0.422352
GOTERM_CC_DIRECT	GO:0070062	extracellular exosome	22	22	0.0581344	LRRC26, ST14, JUP, H2AFX, HUWE1, EEF2, PPL, SND1, VASN, PRRC2A, FAM129B, EHD1, ACLY, EHD2, FASN, FLNA, FLNB, UBA1, SFN, CAPN1, TLN1, PHLDA3	97	2811	18224	1.47039	0.999985	0.537743	0.511582
GOTERM_CC_DIRECT	GO:0010008	endosome membrane	4	4	0.0742487	EHD1, EHD2, STEAP3, UBA1	97	185	18224	4.06219	0.999999	0.654096	0.622275
GOTERM_CC_DIRECT	GO:0000790	nuclear chromatin	4	4	0.0819226	NCOR2, CEBPB, H2AFX, ARID1A	97	193	18224	3.89381	1	0.688895	0.655381
GOTERM_CC_DIRECT	GO:0035371	microtubule plus-end	2	2	0.085912	DCTN1, NCKAP5L	97	17	18224	22.1031	1	0.691032	0.657414
GOTERM_CC_DIRECT	GO:0016234	inclusion body	2	2	0.0907318	GYS1, HSPA1A	97	18	18224	20.8751	1	0.699391	0.665366
GOTERM_MF_DIRECT	GO:0098641	cadherin binding involved in cell-cell adhesion	16	16	8.76447e-11	UNC45A, JUP, EEF2, PPL, SND1, VASN, FAM129B, EHD1, LARP1, BAG3, FASN, FLNA, FLNB, SFN, TLN1, HSPA1A	97	290	16881	9.60171	2.13853e-08	2.13853e-08	2.12977e-08
GOTERM_MF_DIRECT	GO:0044822	poly(A) RNA binding	22	22	1.11419e-06	UPF1, HUWE1, POLRMT, EEF2, SND1, PRRC2B, PRRC2A, CHERP, BOP1, RBM15B, LARP1, PDCD11, TRIM28, POLR2A, DHX34, FASN, FLNA, FLNB, UBA1, EPPK1, SLC16A3, PTRF	97	1129	16881	3.39121	0.000271825	0.000135931	0.000135374
GOTERM_MF_DIRECT	GO:0005515	protein binding	68	68	0.000294758	STEAP3, CLPB, PWWP2B, CCNF, IGF1R, HK1, RPTOR, GYS1, TRIM28, CAPN1, SLC16A3, PTRF, UNC45A, VPS18, UPF1, KLF13, H2AFX, AP1B1, POLRMT, ARID1A, SND1, NCOR2, ACLY, POLR1A, ROR2, TLN1, MCM2, GTF3C1, CEBPB, DCTN1, IGHMBP2, NOTCH2NL, MLLT1, AMBRA1, PPL, BAG6, RAI1, RBM15B, LARP1, POLR2A, PDCD11, BAG3, RAB26, BAHD1, ABL1, FLNA, FLNB, SFN, LRRC26, CBX6, JUP, NCKAP5L, HUWE1, HPS6, EEF2, VASN, PRRC2B, CHERP…	97	8785	16881	1.34708	0.0694054	0.0239736	0.0238754
GOTERM_MF_DIRECT	GO:0019901	protein kinase binding	8	8	0.00562151	RPTOR, FAM83H, GYS1, JUP, AP1B1, SFN, EEF2, BCAR1	97	376	16881	3.70279	0.747291	0.286724	0.285549
GOTERM_MF_DIRECT	GO:0003677	DNA binding	19	19	0.0058755	GTF3C1, UPF1, CEBPB, ZNF282, H2AFX, IGHMBP2, HUWE1, MLLT1, ARID1A, POLRMT, NCOR2, PC, ZNF629, TRIM28, POLR2A, POLR1A, NFIC, ABL1, MCM2	97	1674	16881	1.97526	0.762562	0.286724	0.285549
GOTERM_MF_DIRECT	GO:0003899	DNA-directed RNA polymerase activity	3	3	0.0196997	POLR2A, POLR1A, POLRMT	97	38	16881	13.7393	0.992208	0.801121	0.797838
GOTERM_MF_DIRECT	GO:0043022	ribosome binding	3	3	0.0340718	BAG6, IGHMBP2, EEF2	97	51	16881	10.2371	0.999788	1	1
GOTERM_MF_DIRECT	GO:0051015	actin filament binding	4	4	0.0394685	ABL1, FLNA, EEF2, TLN1	97	132	16881	5.27366	0.999946	1	1
GOTERM_MF_DIRECT	GO:0005524	ATP binding	15	15	0.0429718	UPF1, CLPB, IGHMBP2, IGF1R, HK1, EHD1, ACLY, EHD2, PC, DHX34, ABL1, UBA1, ROR2, HSPA1A, MCM2	97	1495	16881	1.74613	0.999978	1	1
GOTERM_MF_DIRECT	GO:0005536	glucose binding	2	2	0.0608243	GYS1, HK1	97	11	16881	31.642	1	1	1
GOTERM_MF_DIRECT	GO:0005525	GTP binding	6	6	0.0679651	EHD1, EHD2, URGCP, RAB26, EEF2, RHOBTB2	97	384	16881	2.71923	1	1	1
GOTERM_MF_DIRECT	GO:0003682	chromatin binding	6	6	0.0722105	NCOR2, UPF1, CEBPB, TRIM28, POLR1A, BAHD1	97	391	16881	2.67055	1	1	1
GOTERM_MF_DIRECT	GO:0008134	transcription factor binding	5	5	0.078703	NCOR2, CEBPB, PDCD11, IGHMBP2, FLNA	97	284	16881	3.06392	1	1	1
GOTERM_MF_DIRECT	GO:0031625	ubiquitin protein ligase binding	5	5	0.0810798	BAG6, POLR2A, TRIM28, AMBRA1, HSPA1A	97	287	16881	3.0319	1	1	1
KEGG_PATHWAY	hsa04152	AMPK signaling pathway	5	5	0.00541096	RPTOR, GYS1, FASN, EEF2, IGF1R	41	123	6879	6.82035	0.405992	0.519453	0.519453
KEGG_PATHWAY	hsa04510	Focal adhesion	5	5	0.0307813	FLNA, FLNB, TLN1, BCAR1, IGF1R	41	206	6879	4.07234	0.950285	1	1
KEGG_PATHWAY	hsa04910	Insulin signaling pathway	4	4	0.0455128	RPTOR, GYS1, FASN, HK1	41	138	6879	4.8632	0.988573	1	1
KEGG_PATHWAY	hsa05202	Transcriptional misregulation in cancer	4	4	0.0722372	CEBPB, JUP, MLLT1, IGF1R	41	167	6879	4.01869	0.999252	1	1
